# Supplementary material for: Necrosis inducing tetranuclear Ru( ii )–Re( i ) metal complex for anticancer therapy
Source: Royal Society of Chemistry journal article supplement (doi:10.1039/d4dt02992e), 2024-12-18
Supplement: d4dt02992e1.pdf [file d4dt02992e1.pdf]

## Supporting Information

# Necrosis Inducing Tetranuclear Ru(II) - Re(I) Metal Complex for Anticancer Therapy

*Julia Schleisiek,<sup>a</sup> Eleni Michaltsis<sup>a</sup> Stephan Mayer<sup>a</sup> Nicolás Montesdeoca,<sup>a</sup>*

*Johannes Karges<sup>a,\*</sup>*

<sup>a</sup> Faculty of Chemistry and Biochemistry, Ruhr-University Bochum, Universitätsstrasse 150,  
44780 Bochum, Germany.

\* Email: [johannes.karges@ruhr-uni-bochum.de](mailto:johannes.karges@ruhr-uni-bochum.de), Tel: +49 2343224187; WWW:  
[www.kargesgroup.ruhr-uni-bochum.de](http://www.kargesgroup.ruhr-uni-bochum.de)

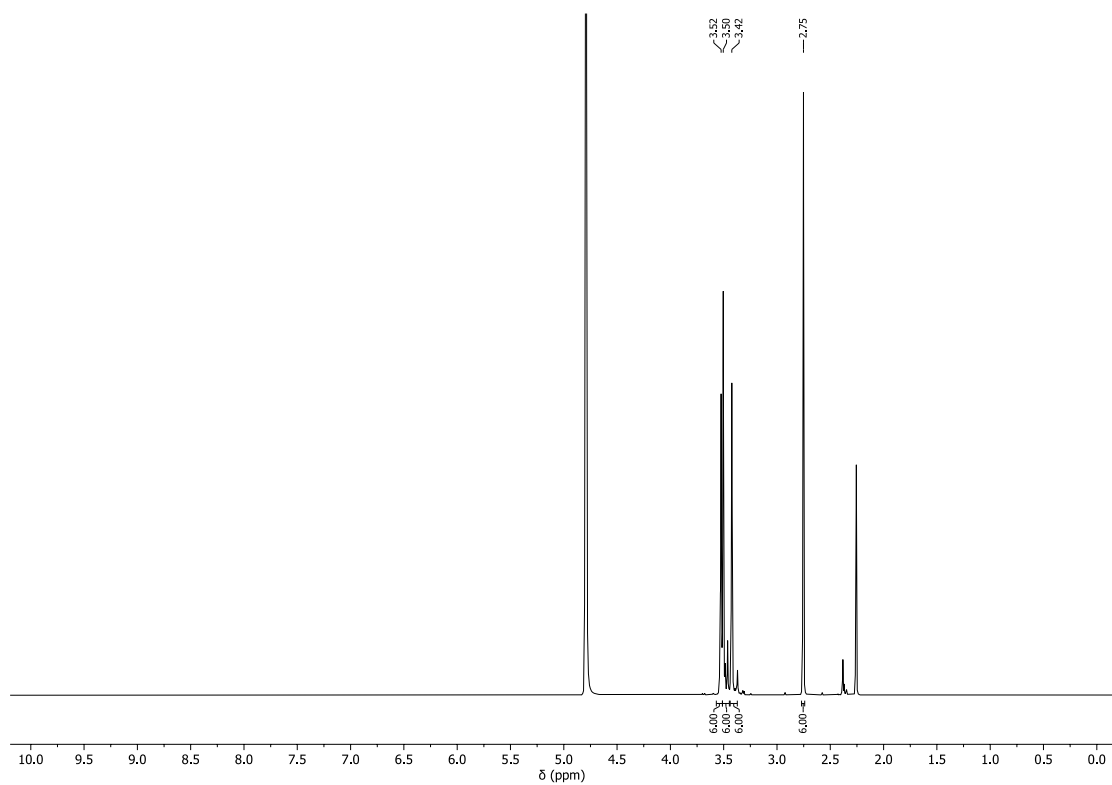

**Figure S1.**  $^1\text{H}$ -NMR spectrum (400 MHz) of  $[\text{Ru}(\text{dimethyl sulfoxide})_4(\text{Cl})_2]$  in  $\text{D}_2\text{O}$ .

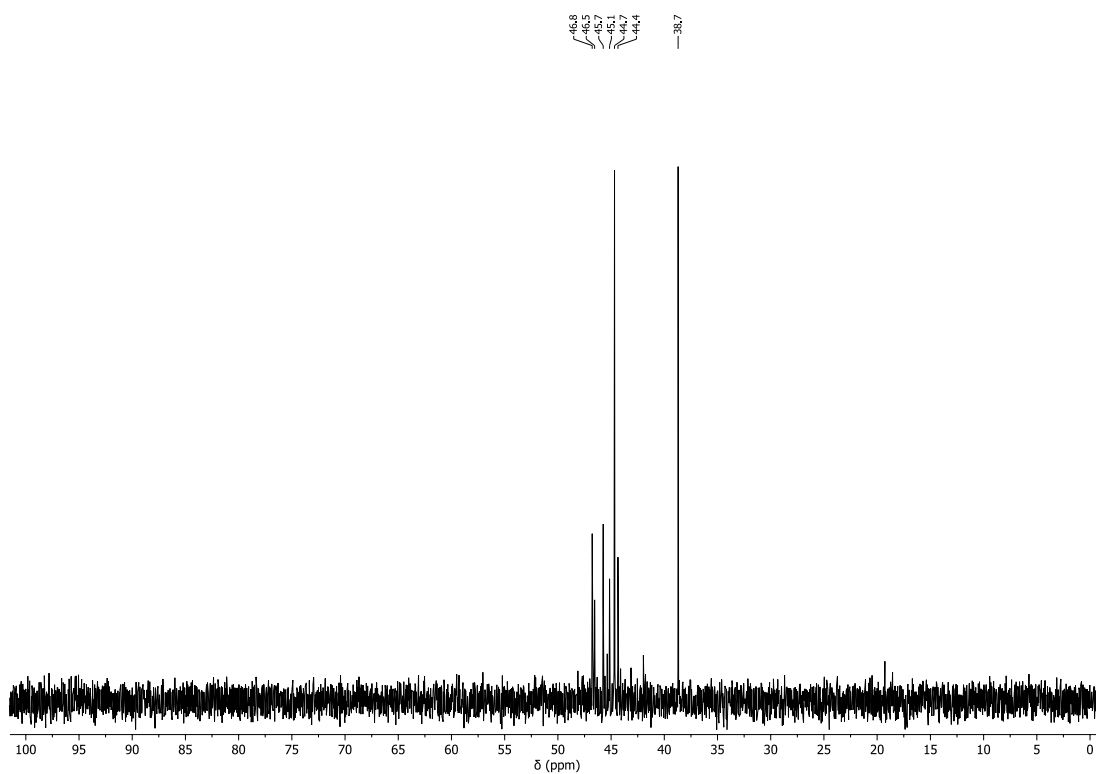

**Figure S2.**  $^{13}\text{C}$ -NMR spectrum (100 MHz) of  $[\text{Ru}(\text{dimethyl sulfoxide})_4(\text{Cl})_2]$  in  $\text{D}_2\text{O}$ .

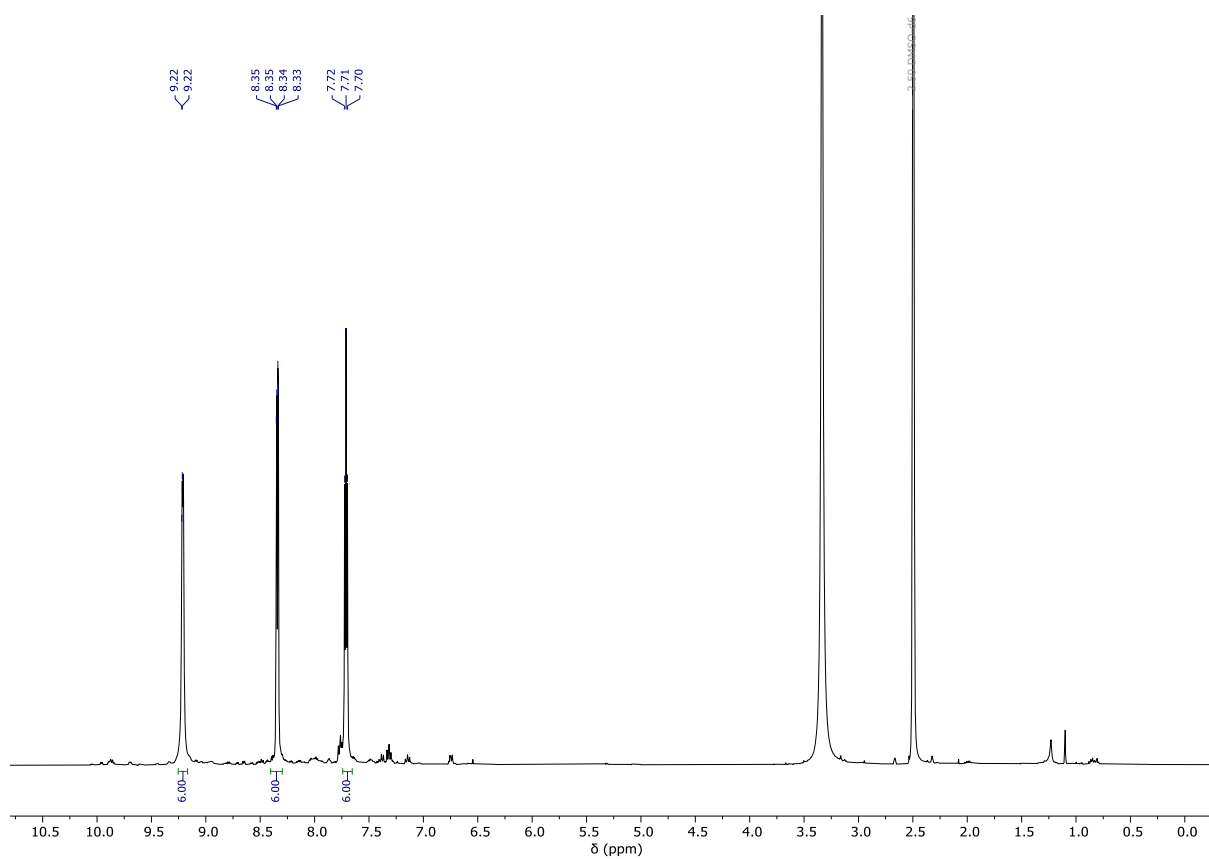

**Figure S3.**  $^1\text{H}$ -NMR spectrum (400 MHz) of  $[\text{Ru}(2,2'\text{-bipyrimidine})_3][\text{Cl}]_2$  in  $\text{DMSO-d}_6$ .

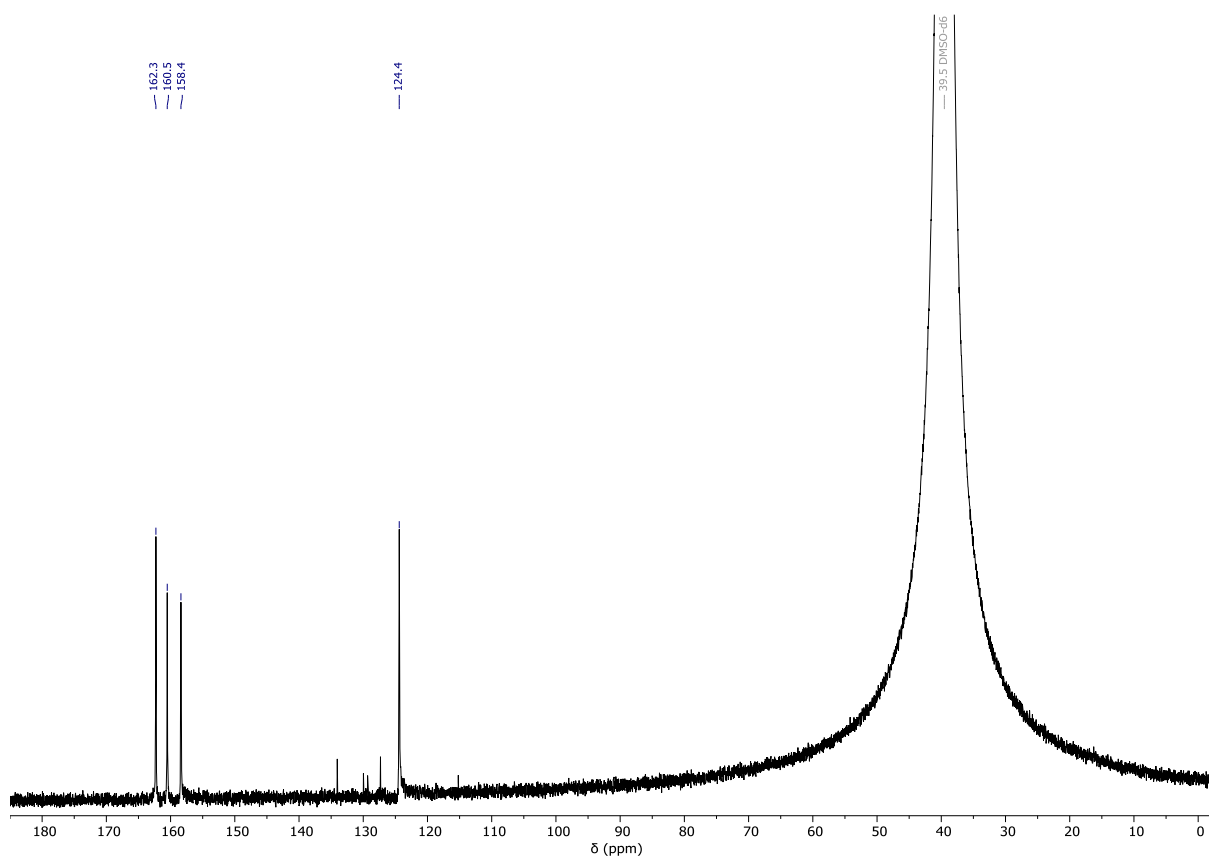

**Figure S4.**  $^{13}\text{C}$ -NMR spectrum (100 MHz) of  $[\text{Ru}(2,2'\text{-bipyrimidine})_3][\text{Cl}]_2$  in  $\text{DMSO-d}_6$ .

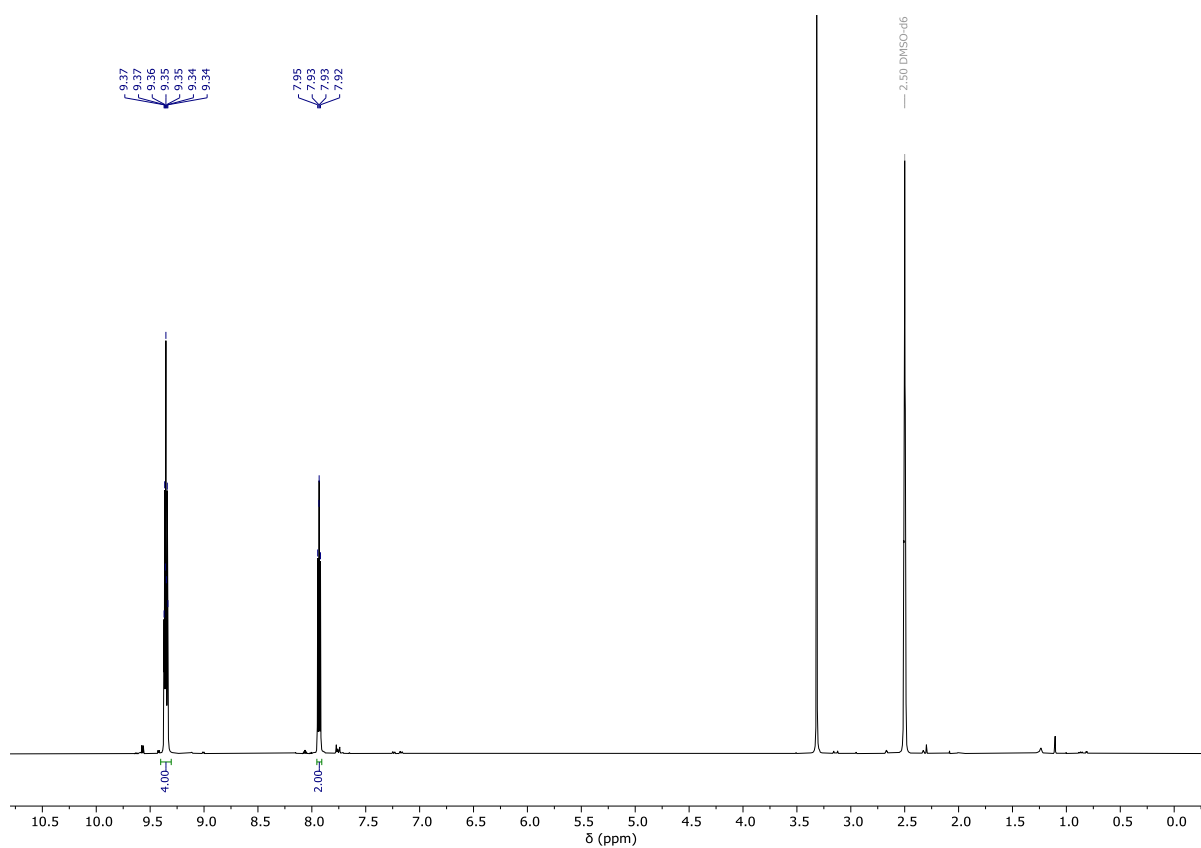

**Figure S5.**  $^1\text{H}$ -NMR spectrum (400 MHz) of  $[\text{Re}(2,2'\text{-bipyrimidine})(\text{CO})_3(\text{Cl})]$  in  $\text{DMSO-d}_6$ .

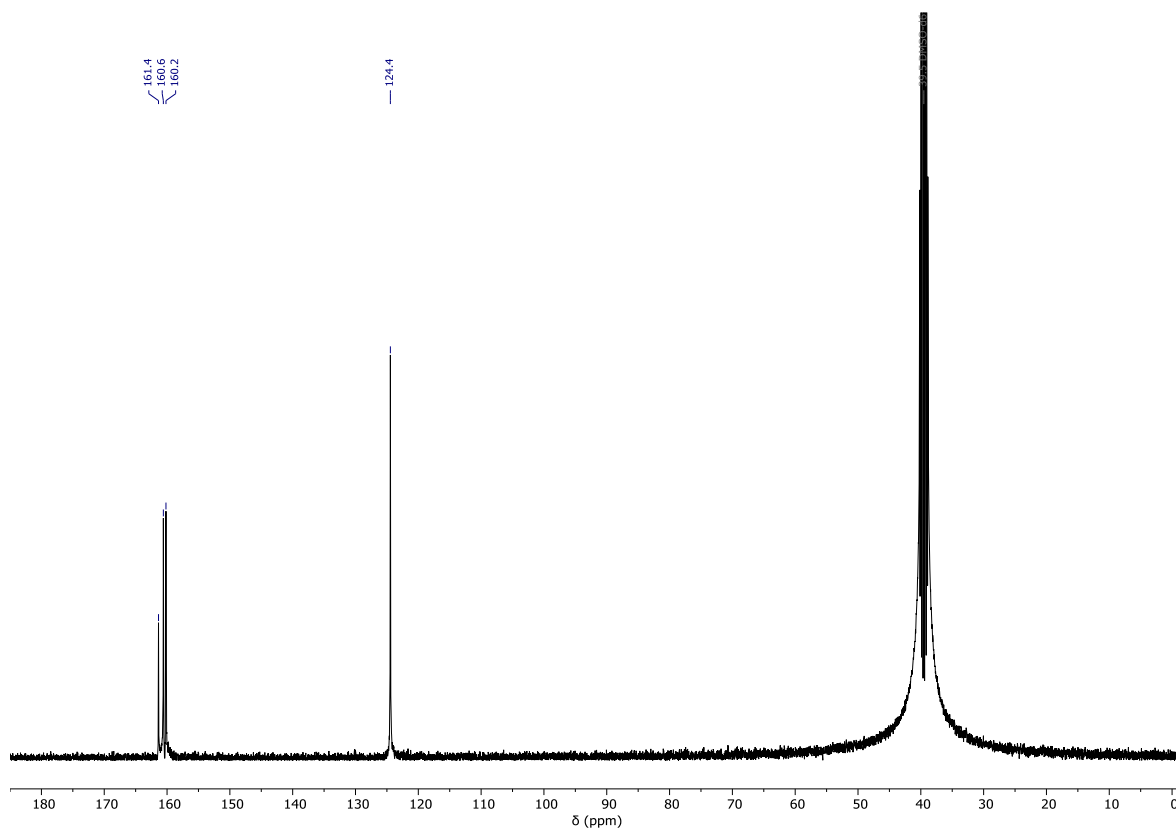

**Figure S6.**  $^{13}\text{C}$ -NMR spectrum (100 MHz) of  $[\text{Re}(2,2'\text{-bipyrimidine})(\text{CO})_3(\text{Cl})]$  in  $\text{DMSO-d}_6$ .

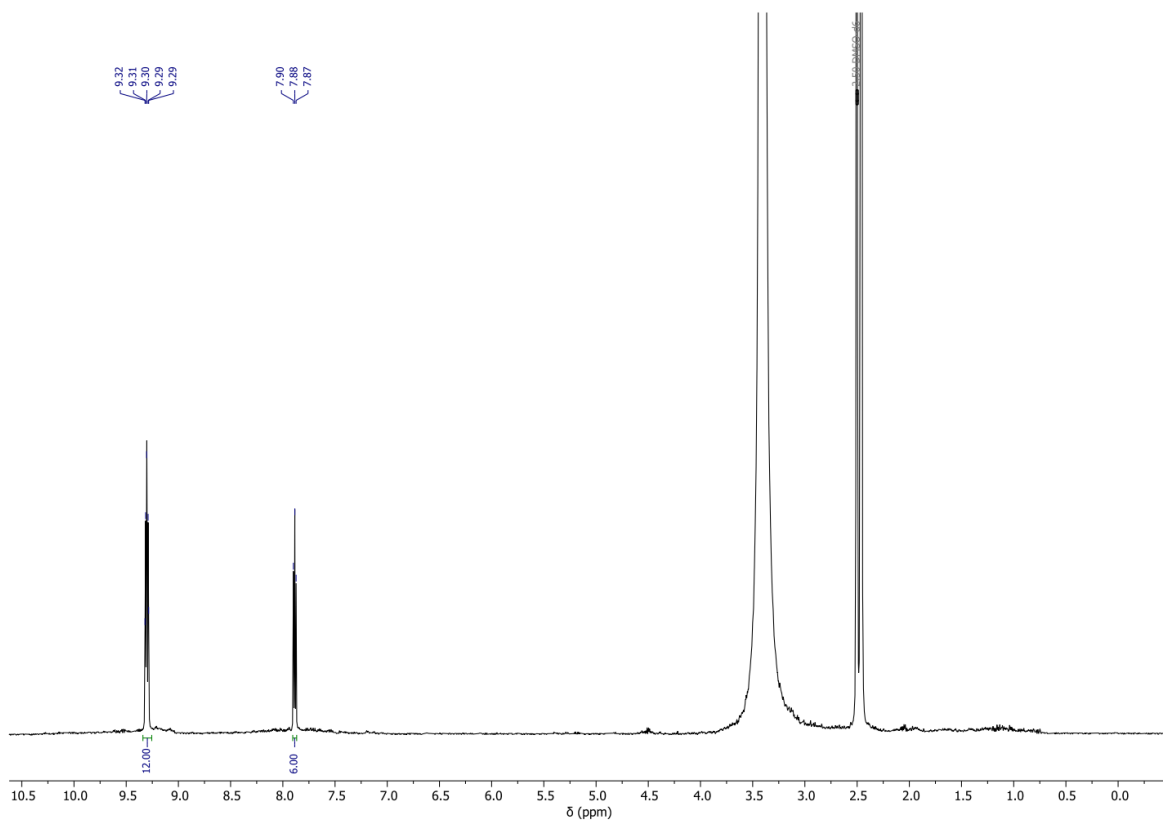

**Figure S7.**  $^1\text{H-NMR}$  spectrum (400 MHz) of  $[\text{Ru}(\text{Re}(2,2'\text{-bipyrimidine})(\text{CO})_3(\text{Cl}))_3][\text{Cl}]_2$  in  $\text{DMSO-d}_6$ .

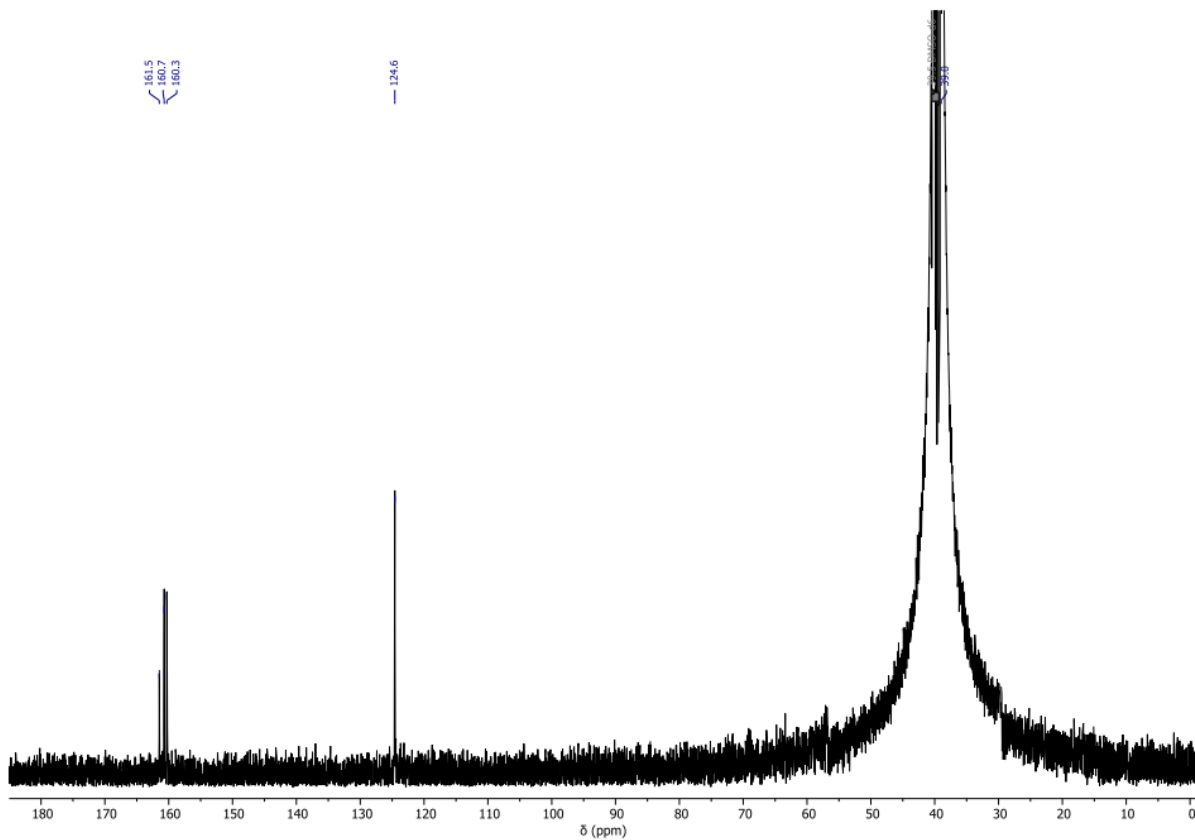

**Figure S8.**  $^{13}\text{C-NMR}$  spectrum (100 MHz) of  $[\text{Ru}(\text{Re}(2,2'\text{-bipyrimidine})(\text{CO})_3(\text{Cl}))_3][\text{Cl}]_2$  in  $\text{DMSO-d}_6$ .

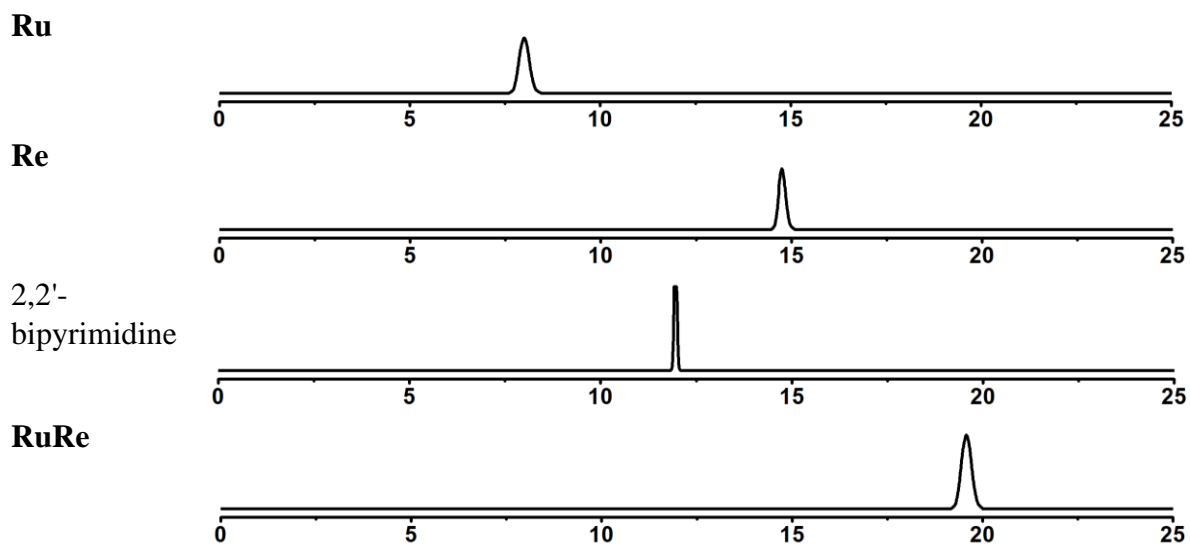

**Figure S9.** High-pressure liquid chromatography chromatograms of  $[\text{Ru}(2,2'\text{-bipyrimidine})_3][\text{Cl}]_2$  (**Ru**),  $[\text{Re}(2,2'\text{-bipyrimidine})(\text{CO})_3(\text{Cl})]$  (**Re**), 2,2'-bipyrimidine, and  $[\text{Ru}(\text{Re}(2,2'\text{-bipyrimidine})(\text{CO})_3(\text{Cl}))_3][\text{Cl}]_2$  (**RuRe**).

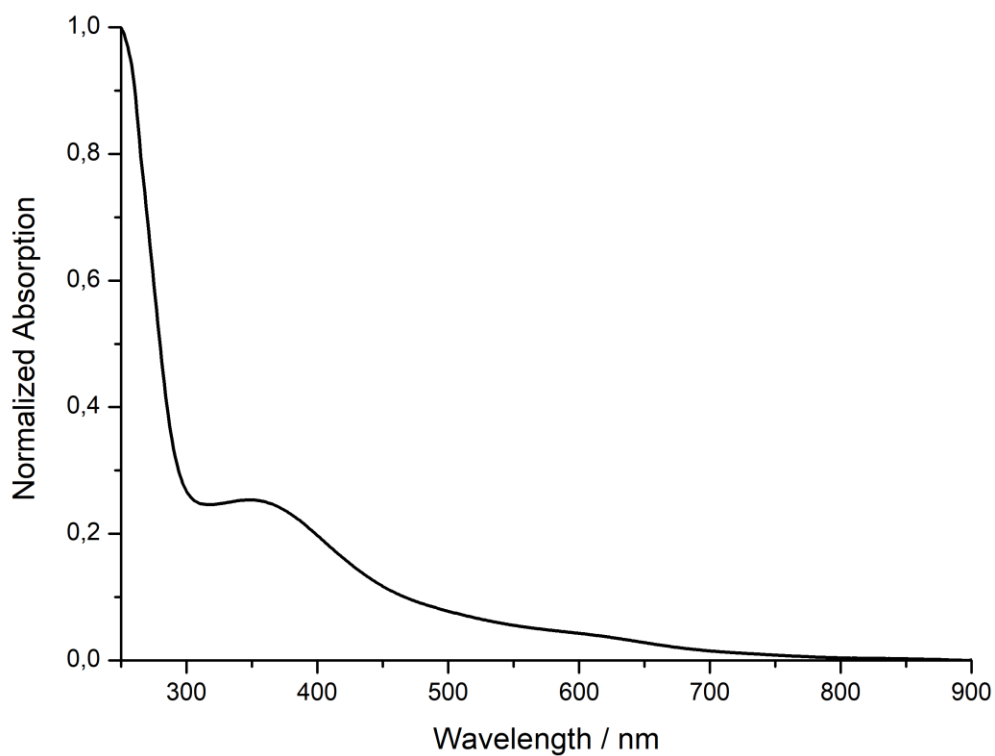

**Figure S10.** Normalized absorption spectrum of  $[\text{Ru}(\text{Re}(2,2'\text{-bipyrimidine})(\text{CO})_3(\text{Cl}))_3][\text{Cl}]_2$  in water.

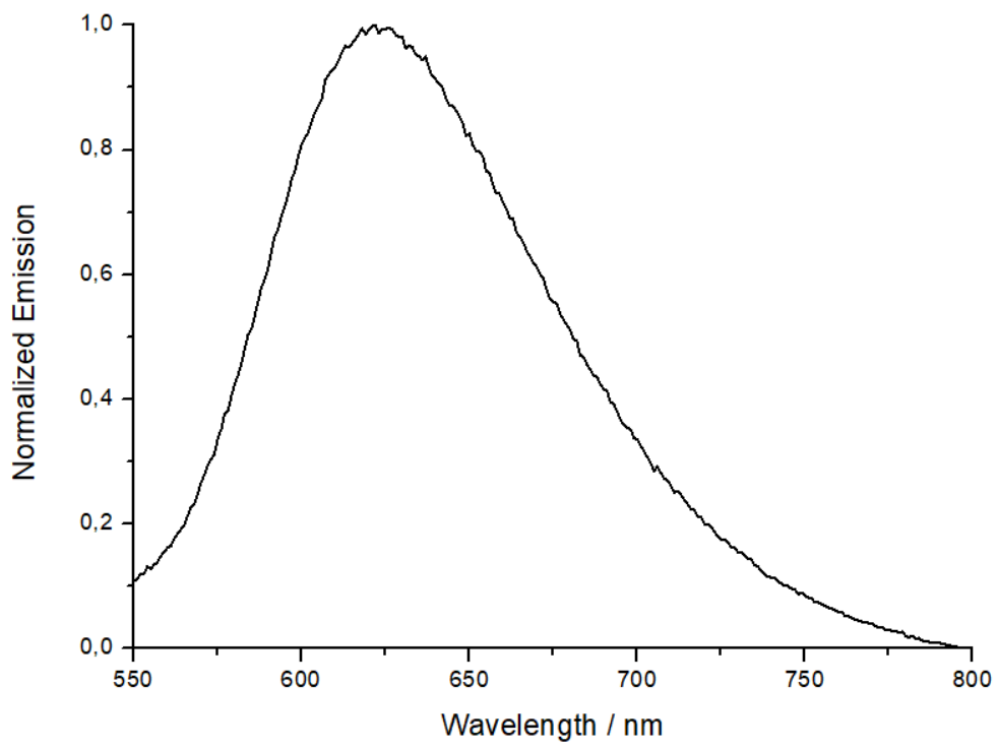

**Figure S10.** Normalized emission spectrum of  $[\text{Ru}(\text{Re}(2,2'\text{-bipyrimidine})(\text{CO})_3(\text{Cl})_3)]_2$  in water upon excitation at 350 nm.

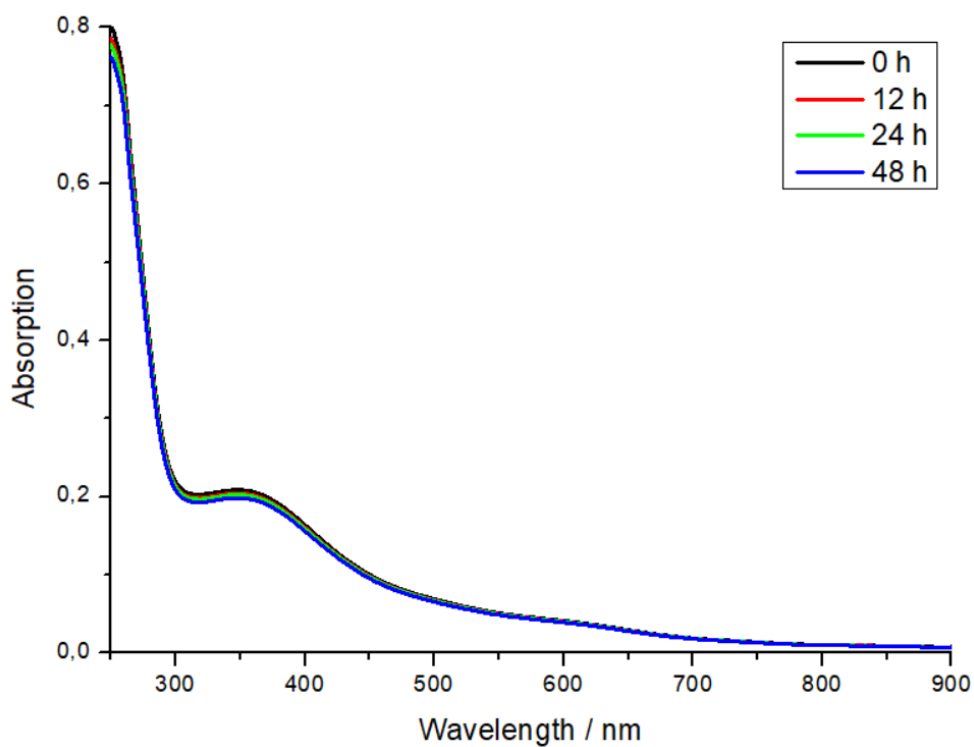

**Figure S11.** Change in the absorption profile of  $[\text{Ru}(\text{Re}(2,2'\text{-bipyrimidine})(\text{CO})_3(\text{Cl})_3)]_2$  upon incubation in phosphate-buffered saline for up to 48 h.

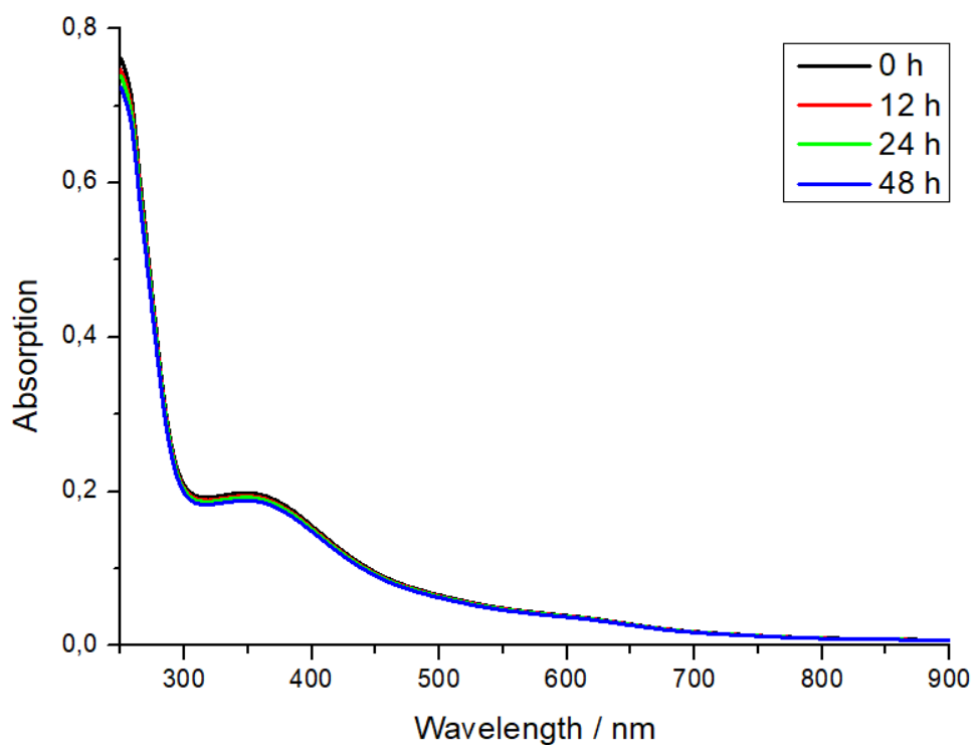

**Figure S12.** Change in the absorption profile of  $[\text{Ru}(\text{Re}(2,2'\text{-bipyrimidine})(\text{CO})_3(\text{Cl})_3)]_2$  upon incubation in DMEM media at  $37^\circ\text{C}$  for up to 48 h.

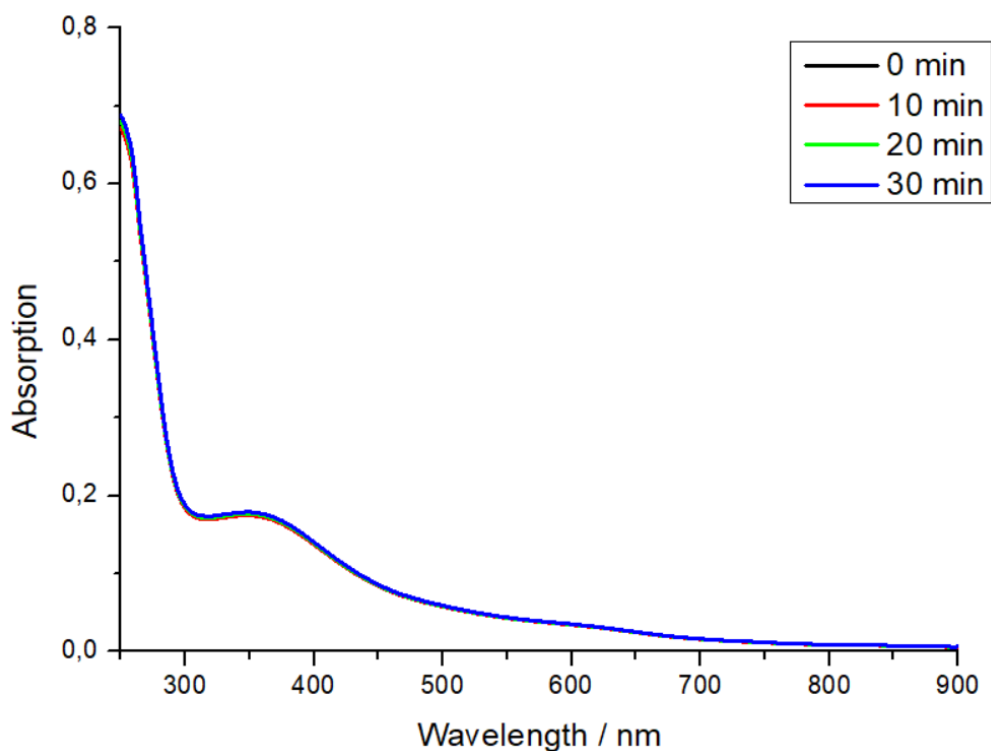

**Figure S13.** Change in the absorption profile of  $[\text{Ru}(\text{Re}(2,2'\text{-bipyrimidine})(\text{CO})_3(\text{Cl})_3)]_2$  upon incubation in phosphate-buffered saline upon irradiation at 450 nm for up to 30 min.



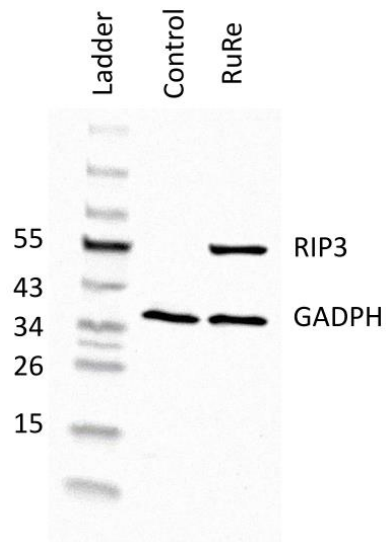

**Figure S14.** Western Blot analysis of the enzymes receptor-interacting kinase 3 (RIP3) and glycerinaldehyd-3-phosphat-dehydrogenase (GADPH) as a reference in CT-26 cells upon treatment with **RuRe**.
